# Supplementary material for: Longitudinal clinical and radiographic evaluation reveals interleukin-6 as an indicator of persistent pulmonary injury in COVID-19
Source: PubMed Central journal article supplement (PMC7738960; doi:10.7150/ijms.49728), 2021-01-01
Supplement: ijmsv18p0029s1.pdf [file ijmsv18p0029s1.pdf]

## Supplementary Materials

**Table S1. Univariable and multivariable analysis of factors at week 2 associated with the severity of COVID-2019.**

| Variables                              | Univariable analysis  |                | Multivariable analysis |                |
|----------------------------------------|-----------------------|----------------|------------------------|----------------|
|                                        | OR (95% CI)           | <i>P</i> value | OR (95% CI)            | <i>P</i> value |
| Neutrophils ( $10^9/L$ )               | 1.753 (1.373 - 2.238) | <0.001         |                        |                |
| Lymphocytes ( $10^9/L$ )               | 0.058 (0.019 - 0.179) | <0.001         |                        |                |
| CD4 <sup>+</sup> T cells ( $10^6/L$ )  | 0.991 (0.986 - 0.997) | 0.001          |                        |                |
| CD8 <sup>+</sup> T cells ( $10^6/L$ )  | 0.989 (0.983 - 0.996) | 0.002          |                        |                |
| CD19 <sup>+</sup> B cells ( $10^6/L$ ) | 0.977 (0.959 - 0.996) | 0.018          |                        |                |
| IL-2 (pg/mL)                           | 1.375 (0.773 - 2.445) | 0.279          |                        |                |
| IL-4 (pg/mL)                           | 1.059 (1.016 - 1.103) | 0.006          |                        |                |
| IL-6 (pg/mL)                           | 1.070 (1.026 - 1.115) | 0.001          | 1.161 (1.034 - 1.303)  | 0.012          |
| IL-10 (pg/mL)                          | 1.317 (1.116 - 1.554) | 0.001          |                        |                |



|                                |          |         |         |       |       |       |  |  |  |                         |
|--------------------------------|----------|---------|---------|-------|-------|-------|--|--|--|-------------------------|
| (%)                            | <i>P</i> | 0.002   | 0.043   |       |       |       |  |  |  | < 0.001                 |
| Monocytes (%)                  | <i>r</i> | - 0.254 | - 0.334 | 0.232 |       |       |  |  |  | - 0.353                 |
|                                | <i>P</i> | 0.005   | 0.009   | 0.008 |       |       |  |  |  | < 0.001                 |
| CD4 <sup>+</sup> T cells (%)   | <i>r</i> |         |         |       |       |       |  |  |  |                         |
|                                | <i>P</i> |         |         |       |       |       |  |  |  |                         |
| CD8 <sup>+</sup> T cells (%)   | <i>r</i> | -0.240  |         |       |       |       |  |  |  |                         |
|                                | <i>P</i> | 0.024   |         |       |       |       |  |  |  |                         |
| CD 19 <sup>+</sup> B cells (%) | <i>r</i> | - 0.388 |         |       |       |       |  |  |  | - 0.346                 |
|                                | <i>P</i> | 0.011   |         |       |       |       |  |  |  | 0.015                   |
| NK cells (%)                   | <i>r</i> |         |         |       |       |       |  |  |  | - 0.358                 |
|                                | <i>P</i> |         |         |       |       |       |  |  |  | 0.048                   |
| NKT cells (%)                  | <i>r</i> | 0.327   | 0.537   |       |       |       |  |  |  | 0.521 0.471             |
|                                | <i>P</i> | 0.019   | < 0.001 |       |       |       |  |  |  | < 0.001 0.001           |
| IL-2 (pg/mL)                   | <i>r</i> | 0.257   |         |       |       |       |  |  |  | 0.347                   |
|                                | <i>P</i> | 0.015   |         |       |       |       |  |  |  | 0.003                   |
| IL-4 (pg/mL)                   | <i>r</i> |         |         |       |       |       |  |  |  | 0.263                   |
|                                | <i>P</i> |         |         |       |       |       |  |  |  | 0.028                   |
| IL-6 (pg/mL)                   | <i>r</i> | 0.344   | 0.388   |       |       |       |  |  |  | 0.442 0.222 0.631       |
|                                | <i>P</i> | 0.001   | < 0.001 |       |       |       |  |  |  | < 0.001 0.036 < 0.001   |
| IL-10 (pg/mL)                  | <i>r</i> | 0.340   | 0.779   |       | 0.275 | 0.221 |  |  |  | 0.536 0.386 0.595       |
|                                | <i>P</i> | 0.001   | < 0.001 |       | 0.009 | 0.038 |  |  |  | < 0.001 < 0.001 < 0.001 |
| TNF- $\alpha$ (pg/mL)          | <i>r</i> |         |         | 0.352 |       |       |  |  |  |                         |
|                                | <i>P</i> |         |         | 0.041 |       |       |  |  |  |                         |
| IFN- $\gamma$ (pg/mL)          | <i>r</i> |         |         |       |       |       |  |  |  |                         |
|                                | <i>P</i> |         |         |       |       |       |  |  |  |                         |

Blanks in this table denote no statistical significance ( $P > 0.05$ ). CRP, C-reactive protein; IP, incubation period; LOH, length of hospitalization; PCT, Procalcitonin; VSP, virus shedding period.



Blanks in this table denote no statistical significance ( $P > 0.05$ ). CRP, C-reactive protein; IP, incubation period; LOH, length of hospitalization; PCT, Procalcitonin; VSP, virus shedding period.



Blanks in this table denote no statistical significance ( $P > 0.05$ ). CRP, C-reactive protein; IP, incubation period; LOH, length of hospitalization; PCT, Procalcitonin; VSP, virus shedding period.





Blanks in this table denote no statistical significance ( $P > 0.05$ ). CRP, C-reactive protein; IP, incubation period; LOH, length of hospitalization; PCT, Procalcitonin; VSP, virus shedding period.

**Table S6. Correlation between immune cells and cytokines in patients with COVID-2019.**

| Variables                          |          | IL-2    | IL-4  | IL-6    | IL-10   | TNF- $\alpha$ | IFN- $\gamma$ |
|------------------------------------|----------|---------|-------|---------|---------|---------------|---------------|
| Neutrophils (count)                | <i>r</i> |         | 0.153 | 0.449   | 0.469   |               |               |
|                                    | <i>P</i> |         | 0.013 | < 0.001 | < 0.001 |               |               |
| Lymphocytes (count)                | <i>r</i> |         |       | - 0.226 | - 0.282 |               |               |
|                                    | <i>P</i> |         |       | < 0.001 | < 0.001 |               |               |
| Monocytes (count)                  | <i>r</i> |         |       |         |         |               |               |
|                                    | <i>P</i> |         |       |         |         |               |               |
| CD4 <sup>+</sup> T cells (count)   | <i>r</i> |         |       | - 0.185 | - 0.188 |               |               |
|                                    | <i>P</i> |         |       | 0.002   | 0.004   |               |               |
| CD8 <sup>+</sup> T cells (count)   | <i>r</i> |         |       | - 0.174 | - 0.194 |               |               |
|                                    | <i>P</i> |         |       | 0.004   | 0.003   |               |               |
| CD 19 <sup>+</sup> B cells (count) | <i>r</i> |         |       |         |         |               |               |
|                                    | <i>P</i> |         |       |         |         |               |               |
| NK cells (count)                   | <i>r</i> |         |       | - 0.244 | - 0.154 | 0.153         |               |
|                                    | <i>P</i> |         |       | 0.001   | 0.031   | 0.033         |               |
| NKT cells (count)                  | <i>r</i> | 0.188   |       |         |         | 0.247         | 0.207         |
|                                    | <i>P</i> | 0.009   |       |         |         | 0.001         | 0.004         |
| Neutrophils (%)                    | <i>r</i> |         |       | 0.312   | 0.398   |               |               |
|                                    | <i>P</i> |         |       | < 0.001 | < 0.001 |               |               |
| Lymphocytes (%)                    | <i>r</i> |         |       | - 0.273 | - 0.362 |               |               |
|                                    | <i>P</i> |         |       | < 0.001 | < 0.001 |               |               |
| Monocytes (%)                      | <i>r</i> |         |       | - 0.235 | - 0.210 |               |               |
|                                    | <i>P</i> |         |       | < 0.001 | 0.001   |               |               |
| CD4 <sup>+</sup> T cells (%)       | <i>r</i> |         |       |         |         |               |               |
|                                    | <i>P</i> |         |       |         |         |               |               |
| CD8 <sup>+</sup> T cells (%)       | <i>r</i> |         |       |         |         |               | 0.132         |
|                                    | <i>P</i> |         |       |         |         |               | 0.044         |
| CD 19 <sup>+</sup> B cells (%)     | <i>r</i> | - 0.147 |       | 0.190   |         |               | - 0.148       |
|                                    | <i>P</i> | 0.040   |       | 0.007   |         |               | 0.039         |
| NK cells (%)                       | <i>r</i> |         |       | - 0.209 | - 0.181 |               |               |
|                                    | <i>P</i> |         |       | 0.003   | 0.011   |               |               |
| NKT cells (%)                      | <i>r</i> |         |       |         |         |               | 0.144         |
|                                    | <i>P</i> |         |       |         |         |               | 0.045         |

Blanks in this table denote no statistical significance ( $P > 0.05$ ).

**Table S7. Univariable and multivariable analysis of factors at week 2 associated with chest CT score of the final time point.**

| Variables                              | Univariable analysis  |                | Multivariable analysis |                |
|----------------------------------------|-----------------------|----------------|------------------------|----------------|
|                                        | OR (95% CI)           | <i>P</i> value | OR (95% CI)            | <i>P</i> value |
| Neutrophils ( $10^9/L$ )               | 1.685 (1.286 - 2.206) | < 0.001        | 1.975 (1.147 - 3.399)  | 0.014          |
| Lymphocytes ( $10^9/L$ )               | 0.077 (0.028 - 0.214) | < 0.001        |                        |                |
| CD4 <sup>+</sup> T cells ( $10^6/L$ )  | 0.994 (0.991 - 0.998) | 0.002          |                        |                |
| CD8 <sup>+</sup> T cells ( $10^6/L$ )  | 0.993 (0.989 - 0.998) | 0.003          |                        |                |
| CD19 <sup>+</sup> B cells ( $10^6/L$ ) | 0.988 (0.976 - 1.000) | 0.058          |                        |                |
| IL-2 (pg/mL)                           | 1.444 (0.789 - 2.640) | 0.223          |                        |                |
| IL-4 (pg/mL)                           | 1.623 (0.545 - 4.837) | 0.385          |                        |                |
| IL-6 (pg/mL)                           | 1.314 (1.131 - 1.526) | < 0.001        | 1.273 (1.068 - 1.518)  | 0.007          |
| IL-10 (pg/mL)                          | 2.447 (1.445 - 4.141) | 0.001          |                        |                |

## Supplementary figure and figure legends

Figure S1

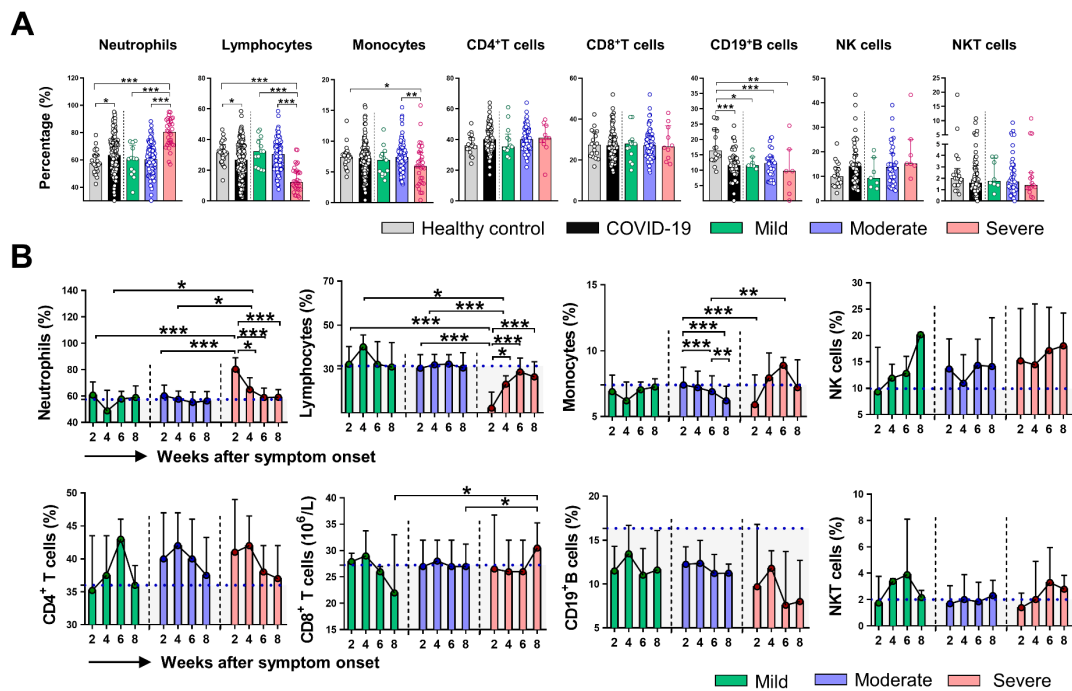

**Figure S1.** Dynamic changes of the percentage of immune cells in patients with COVID-19. (A) The percentage of neutrophils, lymphocytes, monocytes, CD4<sup>+</sup> T, CD8<sup>+</sup> T, CD19<sup>+</sup> B, NK, and NKT cells in healthy control (n = 25) and patients with mild (n = 13), moderate (n = 102) and severe (n = 25) infection with SARS-CoV-2 at the initial time point. (B) Dynamic change of percentage of neutrophils, lymphocytes, monocytes, CD4<sup>+</sup> T, CD8<sup>+</sup> T, CD19<sup>+</sup> B, NK, and NKT cells in patients with COVID-19. \**P* < 0.05, \*\**P* < 0.01, \*\*\**P* < 0.001. Data are presented as the median (interquartile range).

Figure S2

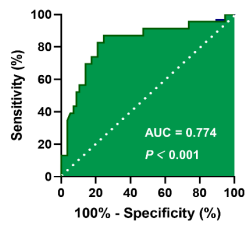

|                  | Area  | 95% CI          | P-value | Cut-off | Sensitivity | Specificity |
|------------------|-------|-----------------|---------|---------|-------------|-------------|
| Disease Severity | 0.774 | (0.670 - 0.878) | < 0.001 | 6.735   | 0.767       | 0.766       |

**Figure S2.** A receiver operating characteristic (ROC) curve was constructed, and the area under the ROC curves (AUC) was calculated to evaluate the predictive capability of IL-6 in identifying the severity of COVID-19.

Figure S3

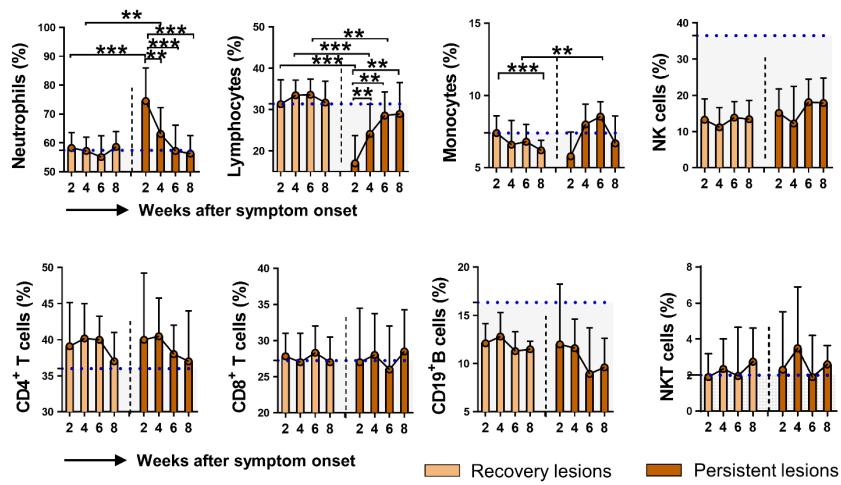

**Figure S3.** Dynamic changes of percentage of neutrophils, lymphocytes, monocytes, CD4<sup>+</sup> T, CD8<sup>+</sup> T, CD19<sup>+</sup> B, NK, and NKT cells in COVID-19 patients with recovery lesions and persistent lesions. \*  $P < 0.05$ , \*\*  $P < 0.01$ , \*\*\*  $P < 0.001$ . Data are presented as the median (interquartile range).
